# Supplementary material for: Identification of differentially expressed proteins in sulfadiazine resistant and sensitive strains of Toxoplasma gondii using difference-gel electrophoresis (DIGE)
Source: PubMed Central journal article supplement — Int J Parasitol Drugs Drug Resist. 2013 Jan 5;3:35–44. doi: 10.1016/j.ijpddr.2012.12.002 (PMC3862439; doi:10.1016/j.ijpddr.2012.12.002), 2013-01-05
Supplement: mmc1.pdf [file mmc1.pdf]

## Supplemental data 1

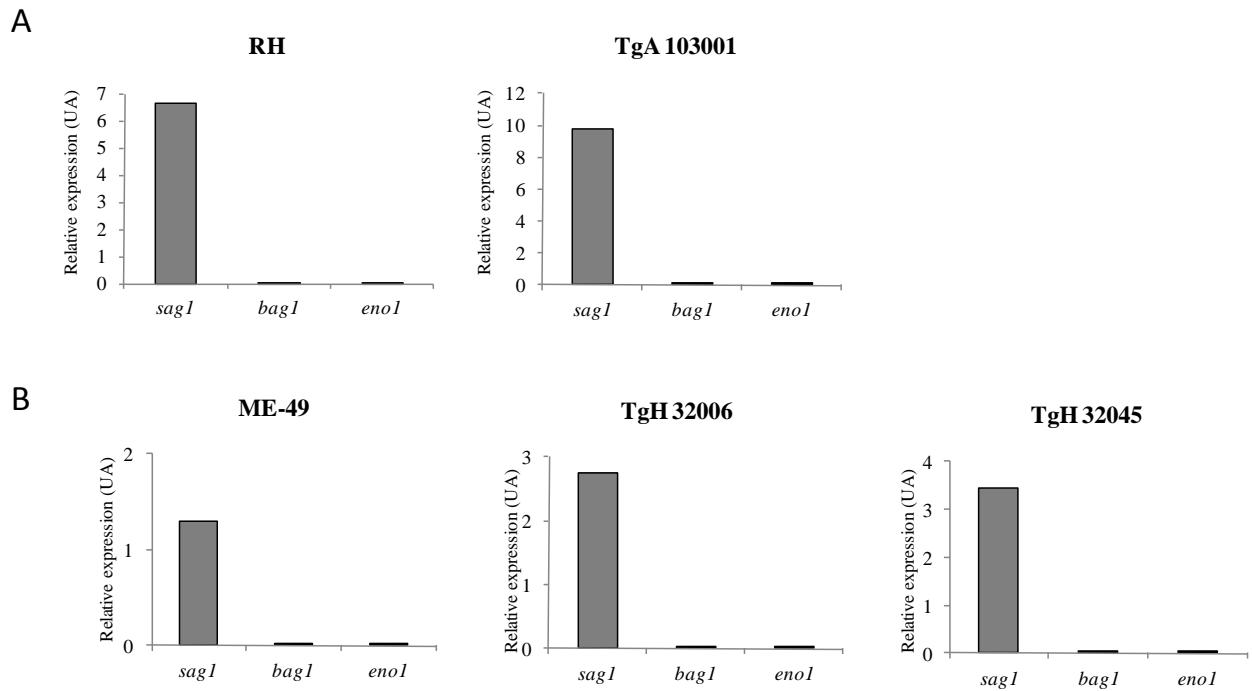

**Relative expression of *T. gondii* tachyzoites markers, *sag1* gene, and bradyzoites markers, *bag1* and *eno1* genes, by real-time qRT-PCR analysis.** Relative expression of *sag1*, *bag1* and *eno1* was evaluated in *T. gondii* genotype I strains (A) and genotype II strains (B). The mRNA levels of *sag1*, *bag1* and *eno1* genes were normalized to housekeeping *toxoplasma*  $\beta$ -*tubulin* gene. Results from one experiment representative of six experiments.

| mRNA        | Sense primer                        | Antisense primer                |
|-------------|-------------------------------------|---------------------------------|
| <i>sag1</i> | 5'-ACG GGG GAT TCT GCT AGT CT-3'    | 5'-GGG GAA CTT CTC GAT TGG A-3' |
| <i>bag1</i> | 5'-TGA GCG AGT GTC CGG TTA TT-3'    | 5'-ATT CCG TCG GGC TTG TAA T-3' |
| <i>eno1</i> | 5'-GAG GCT CTG AAT CTC CTT GTT G-3' | 5'-CTG CGT CAA ATG CGA TCT T-3' |

***Sag1*, *bag1* and *eno1* sequences of primers used for qRT-PCR**

# Supplemental data 2

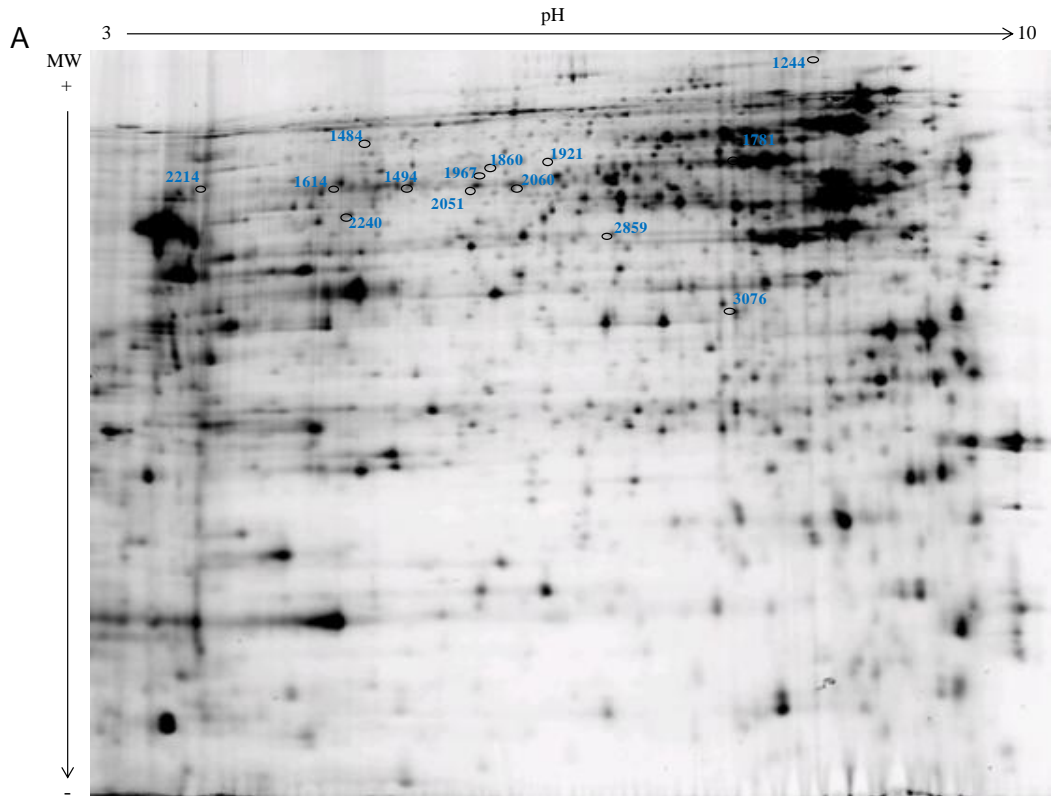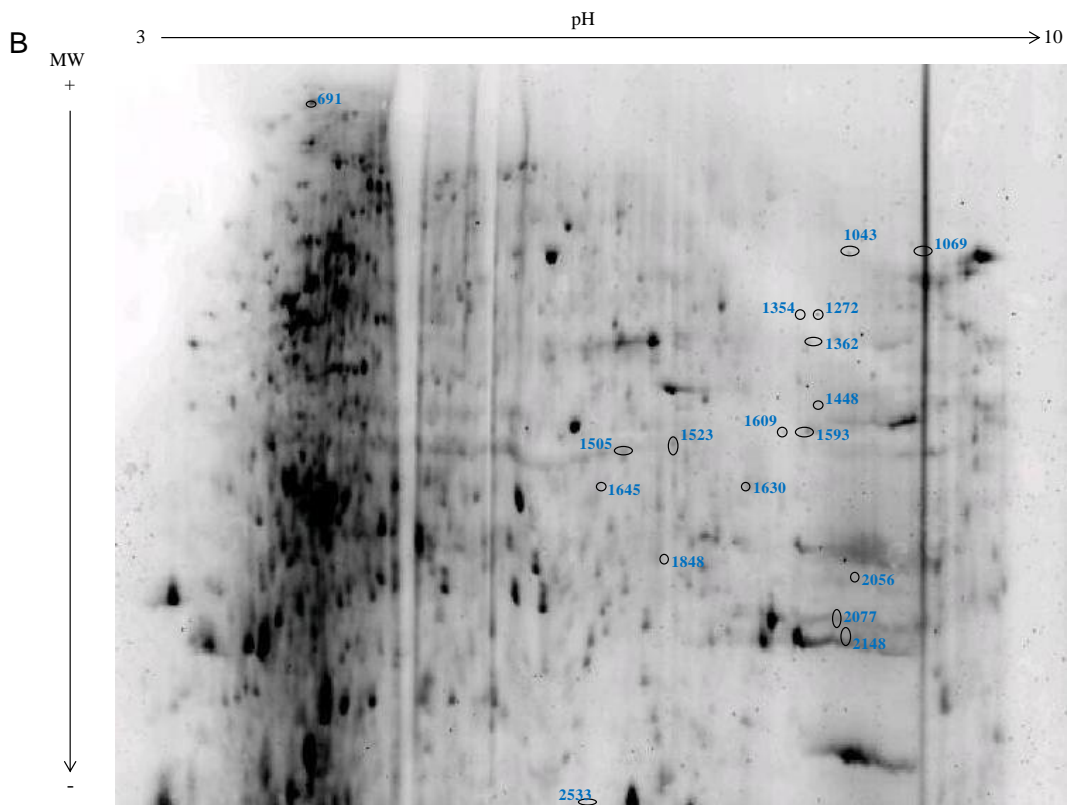

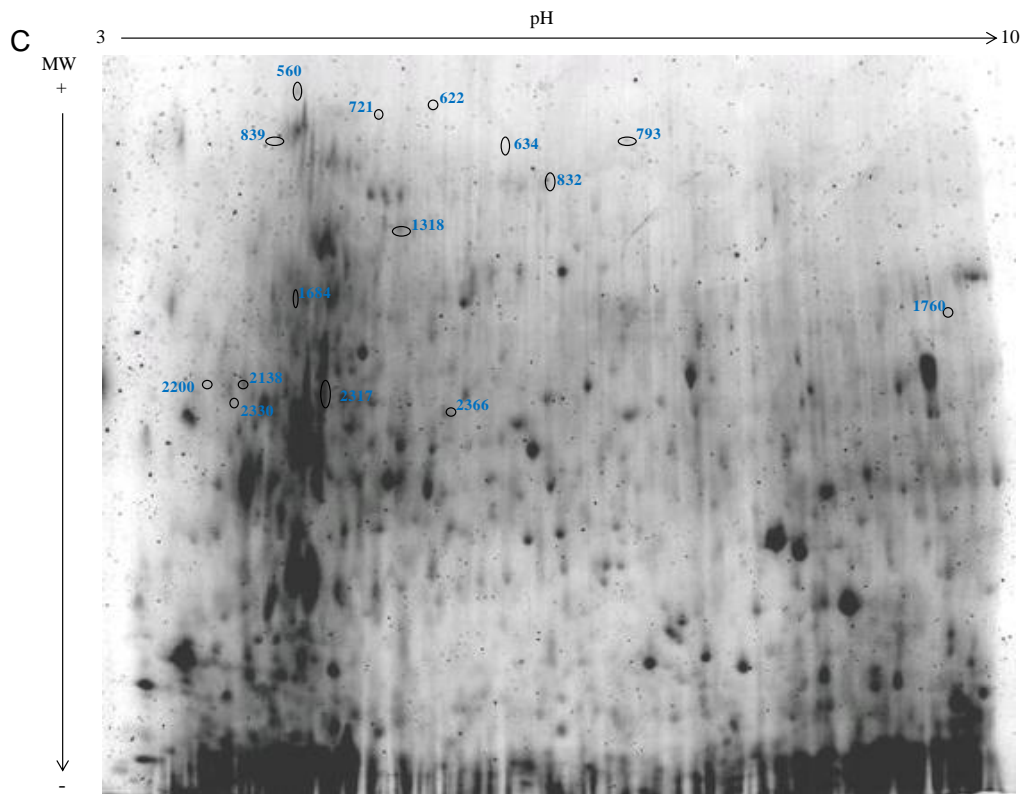

**DIGE gels of *T. gondii* tachyzoites proteins: TgA 103001/RH strains (A), TgH 32045/ME-49 (B) and TgH 32006/ME-49 (C).** (A) Spots numbers are presented in Table I. (B) Spots numbers are presented in Table II. (C) Spots numbers are presented in Table 3.
